# Supplementary material
Source: Springer Nature journal article supplement (https://www.springermedizin.de/resource/supplementary/12876_2012_725_MOESM1_ESM.pdf/9437750)
Supplement: MOESM1 [file 9437750]

**Invitation to 2150 insured persons**

> age 55

No previous colonoscopy in last 10 years

2150 letters sent out (70% of eligible persons)

**941 uninvited persons**

> 55 years

no previous colonoscopy

154 persons: personal appointment  
for information with physician (project)

no patient contact  
for prior information

N= 147 after exclusion criteria

colonoscopy  
outside of project  
n=35

n=4 } spontaneous  
uptake  
n=39/2937\*  
(**1.3%**)

No screening  
N=23

capsule  
colonoscopy (CC)  
N=90 (4.2%)

conventional  
colonoscopy (CO)  
N=34 (1.6%)

} overall screening  
CC and CO  
124/2150 (**5.8%**)

Secondary colonoscopy\*\*  
N=22

14 adenomas (LGIN)

13 adenomas (LGIN)

\* See text; it is not clear to what extent the 35 persons were prompted by the invitation letters. 2937= 3091 (all insured persons) minus 154 project participants  
\*\* 16 cases with polyps found at capsule procedure; 6/15 cases with incomplete capsule colonoscopy (see text)
